# Supplementary material for: Homogeneous decoration of zeolitic imidazolate framework-8 (ZIF-8) with core–shell structures on carbon nanotubes
Source: Royal Society of Chemistry journal article supplement (doi:10.1039/c4ra06792d), 2014-09-26
Supplement: c4ra06792d1.pdf [file c4ra06792d1.pdf]

## Supporting Information

# Homogeneous Decoration of Metal-Organic Frameworks (MOFs) with Core-Shell Structures on Carbon Nanotubes

JongTae Yoo,<sup>a,b</sup> SuHyun Lee,<sup>a,c</sup> Chang Kee Lee,<sup>a</sup> ChaeRin Kim,<sup>b</sup> Tsuyohiko Fujigaya,<sup>b,d</sup>  
Hyun Jin Park,<sup>c</sup> Naotoshi Nakashima,<sup>\*b,d</sup> and Jin Kie Shim<sup>\*a</sup>

<sup>a</sup> Korea Packaging Center, Korea Institute of Industrial Technology, Ojeong-gu, Bucheon 421-742, South Korea

<sup>b</sup> Department of Applied Chemistry, Graduate School of Engineering, Kyushu University,

744 Motooka, Nishi-ku, Fukuoka 819-0395, Japan

<sup>c</sup> College of Life Sciences and Biotechnology, Korea University, Seongbuk-gu, Seoul 136-701, South Korea

<sup>d</sup> International Institute for Carbon-Neutral Energy Research (I2CNER), Kyushu University,

744 Motooka, Nishi-ku, Fukuoka 819-0395, Japan

\* Corresponding author. E-mail: nakashima-tcm@mail.cstm.kyushu-u.ac.jp (N. N.); jkshim@kitech.re.kr (J. S.)

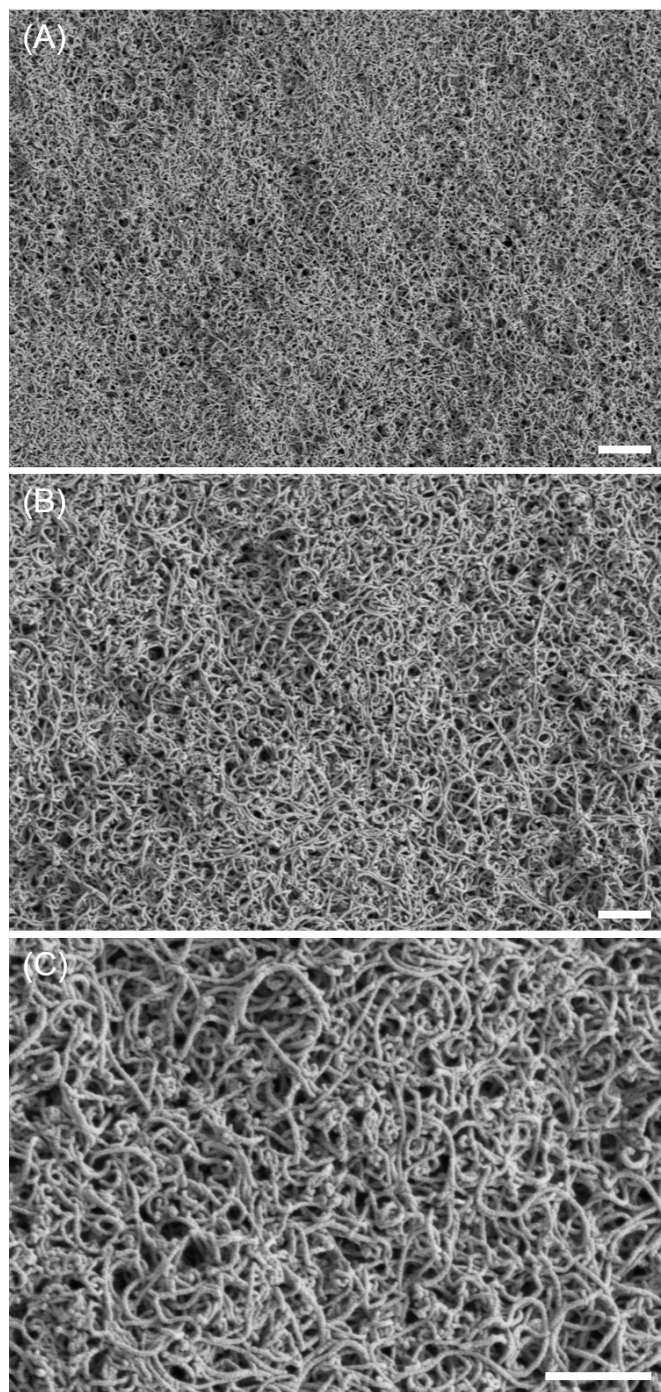

**Fig. S1** Scanning electron microscope (SEM) images of the CNT@ZIF-8 core-shell structures at magnifications of (A) 5, (B) 10, and (C) 20 k. Scale bars: (A) 2 and (B and C) 1  $\mu\text{m}$ .

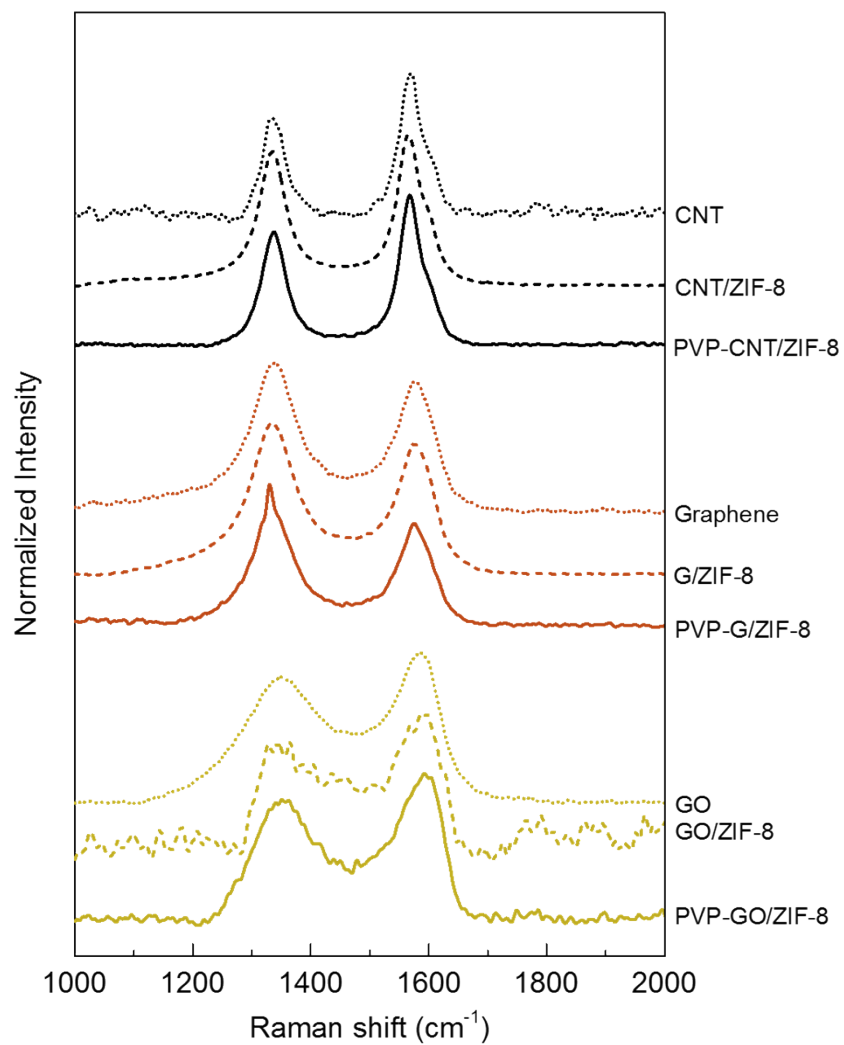

**Fig. S2** Raman spectra of the CNT (black dot-line), CNT/ZIF-8 (black dash-line), PVP-CNT/ZIF-8 (black solid-line), graphene (brown dot-line), G/ZIF-8 (brown dash-line), PVP-G/ZIF-8 (brown solid-line), GO (yellow-brown dot-line), GO/ZIF-8 (yellow-brown dash-line), and PVP-GO/ZIF-8 (yellow-brown solid-line).

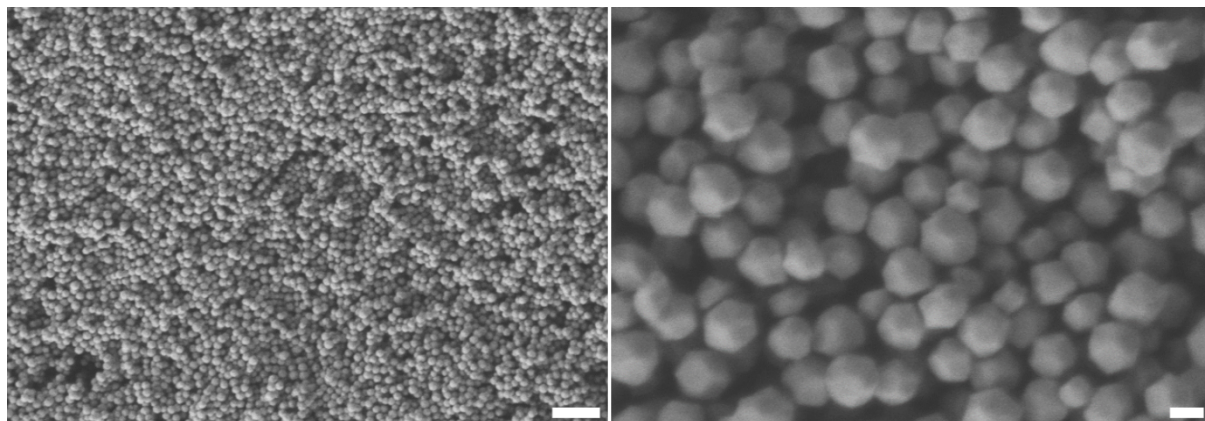

**Fig. S3** SEM images of the ZIF-8 at low (left) and high (right) magnifications. Scale bars: 1  $\mu\text{m}$  (left) and 100 nm (right).

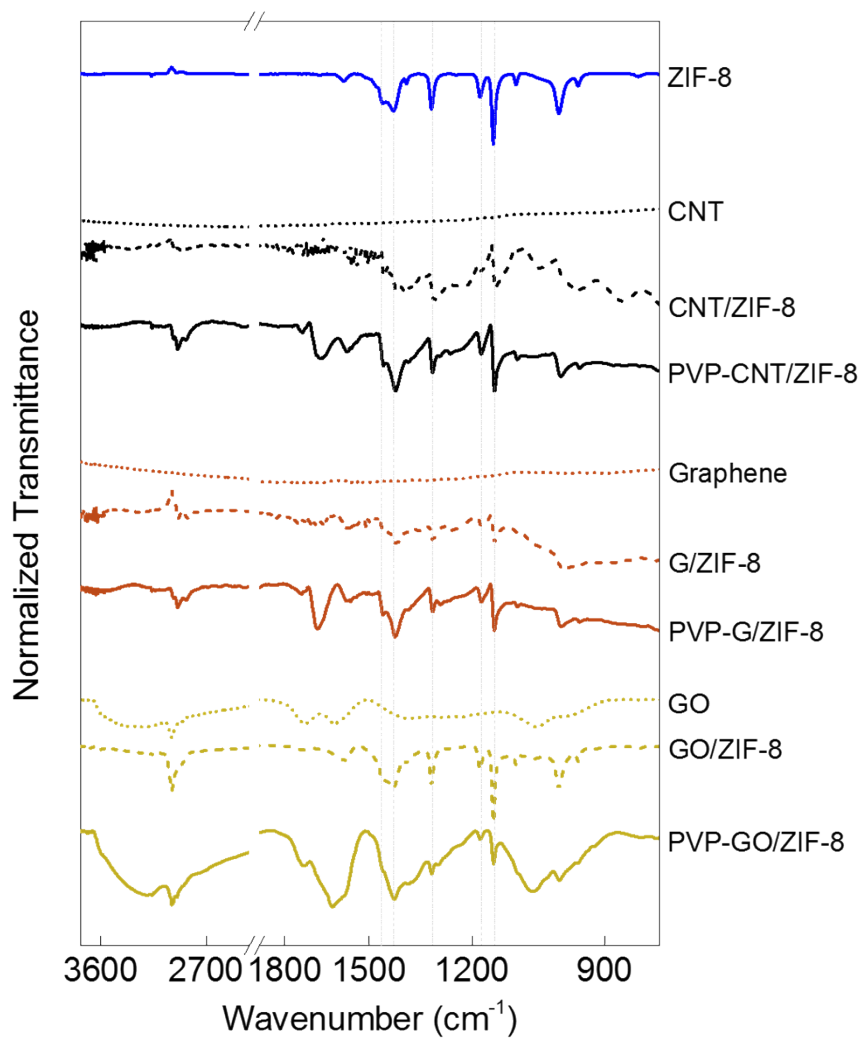

**Fig. S4** FT-IR spectra of the ZIF-8 (blue solid-line), CNT (black dot-line), CNT/ZIF-8 (black dash-line), PVP-CNT/ZIF-8 (black solid-line), graphene (brown dot-line), G/ZIF-8 (brown dash-line), PVP-G/ZIF-8 (brown solid-line), GO (yellow-brown dot-line), GO/ZIF-8 (yellow-brown dash-line), and PVP-GO/ZIF-8 (yellow-brown solid-line).

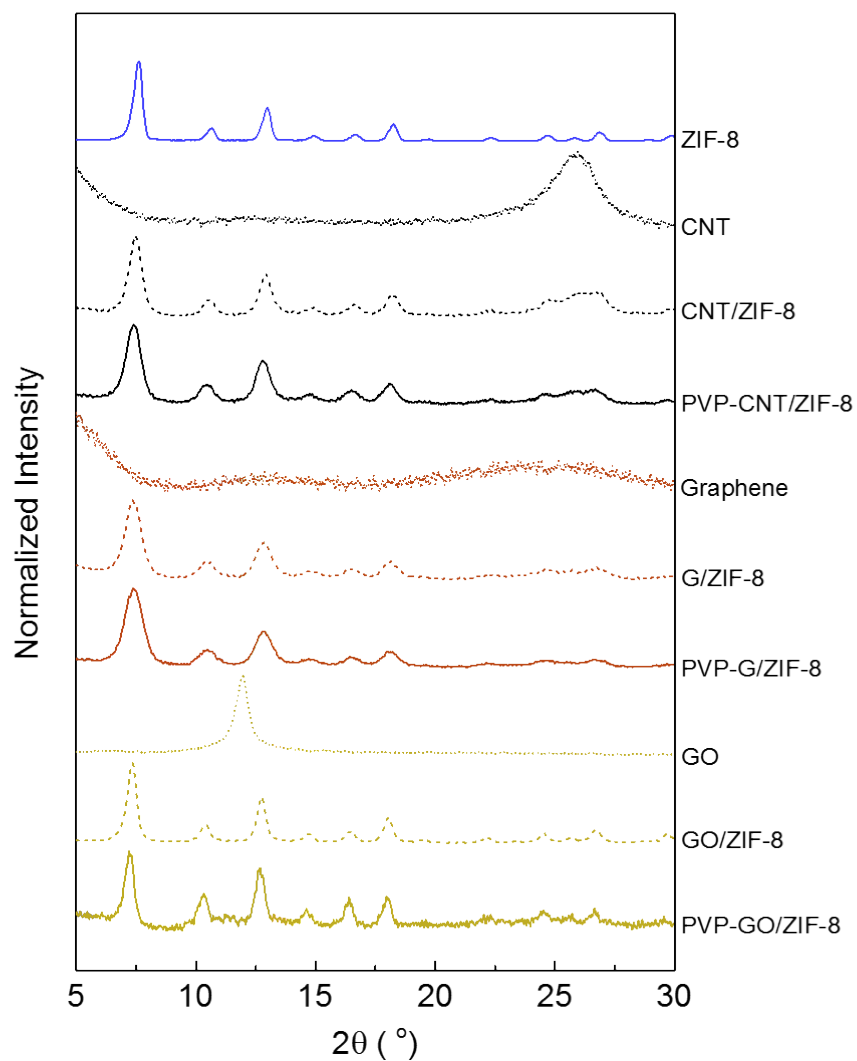

**Fig. S5** XRD patterns of the ZIF-8 (blue solid-line), CNT (black dot-line), CNT/ZIF-8 (black dash-line), PVP-CNT/ZIF-8 (black solid-line), graphene (brown dot-line), G/ZIF-8 (brown dash-line), PVP-G/ZIF-8 (brown solid-line), GO (yellow-brown dot-line), GO/ZIF-8 (yellow-brown dash-line), and PVP-GO/ZIF-8 (yellow-brown solid-line).

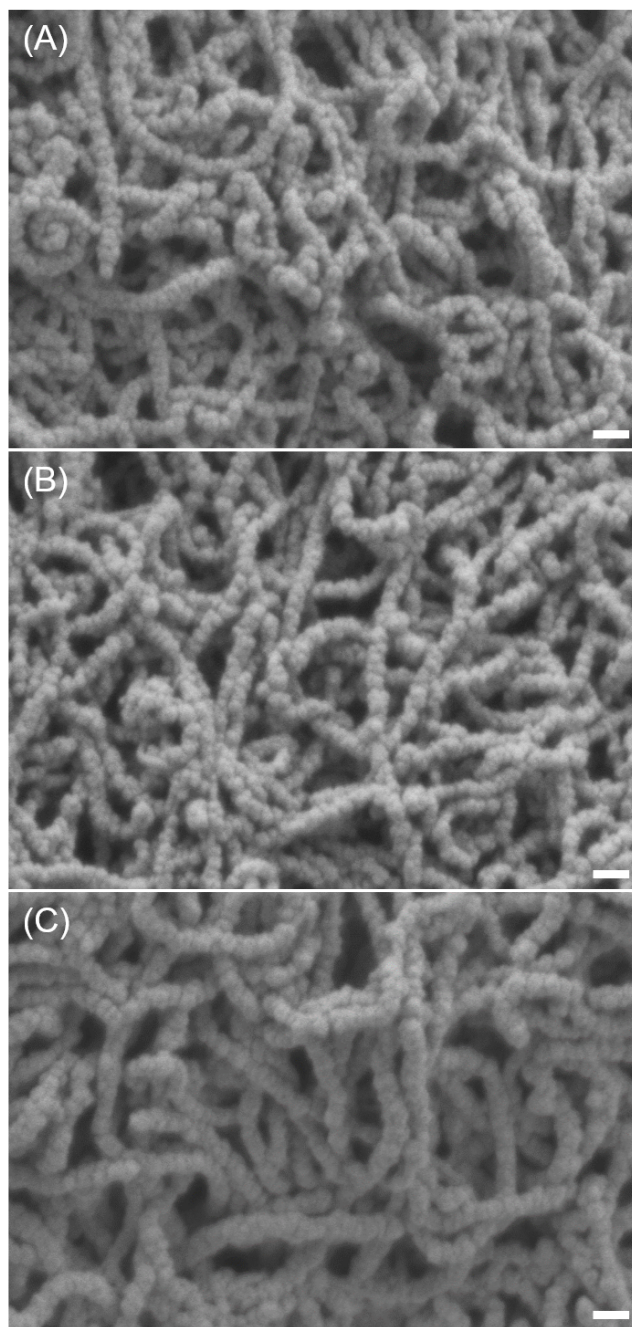

**Fig. S6** SEM images of the PVP-CNT/ZIF-8s collected after the *in situ* synthesis of the ZIF-8 for (A) 15, (B) 60, and (C) 240 min. Scale bars: 100 nm.

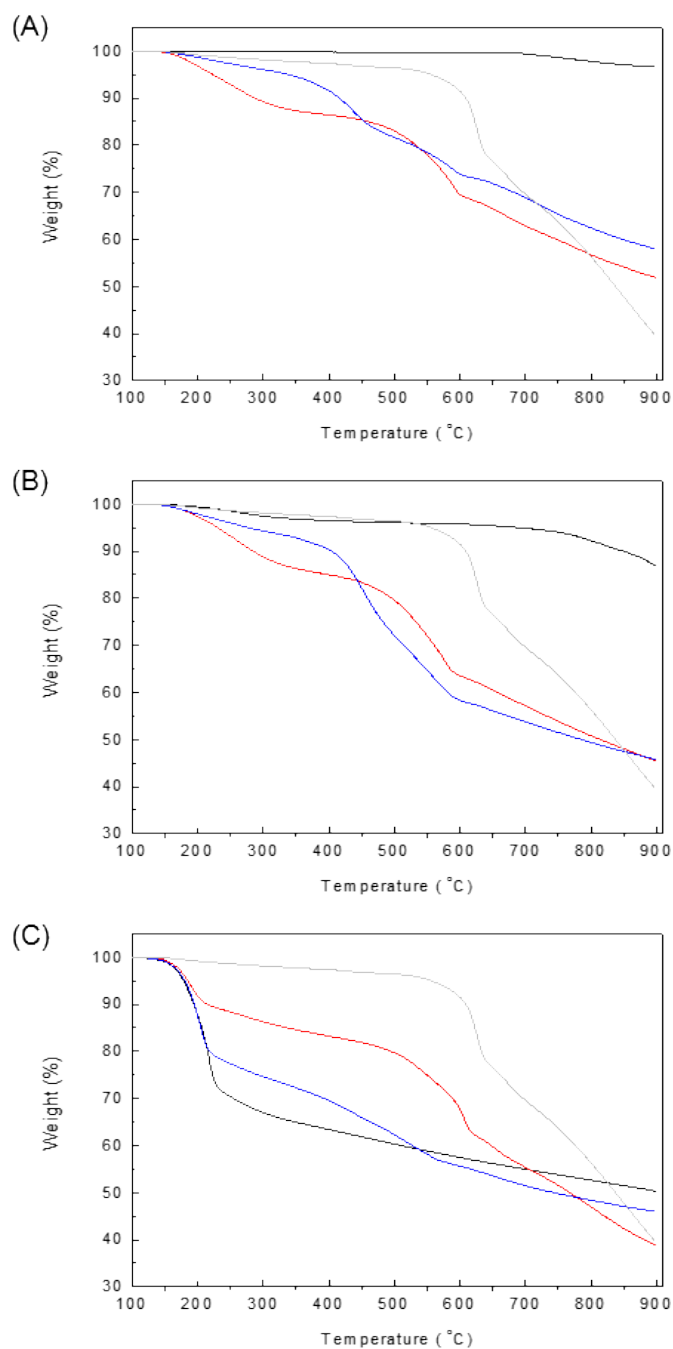

**Fig. S7** TGA of the (A, blue line) PVP-CNT/ZIF-8, (A, red line) CNT/ZIF-8, (A, black line) CNT, (B, blue line) PVP-G/ZIF-8, (B, red line) G/ZIF-8, (B, black line) graphene, (C, blue line) PVP-GO/ZIF-8, (C, red line) GO/ZIF-8, and (C, black line) GO. TGA of the ZIF-8 (gray line) was expressed as a comparison.



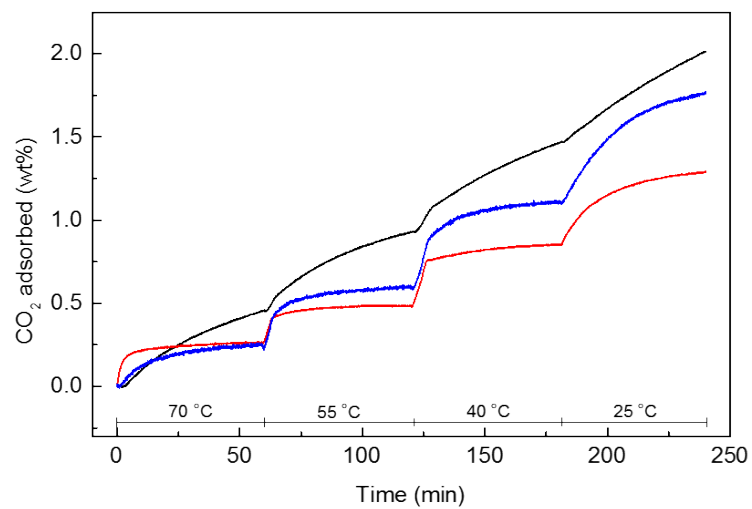

**Fig. S8** TGA showing mass changes due to the adsorption and desorption of CO<sub>2</sub> gases obtained from the PVP-GO/ZIF-8 (blue line), GO/ZIF-8 (red line), and GO (black line) at the temperatures of 70, 55, 40 and 25 °C.
